# Supplementary material
Source: publisher figshare collection journal article supplement (https://rs.figshare.com/ndownloader/files/31072243)

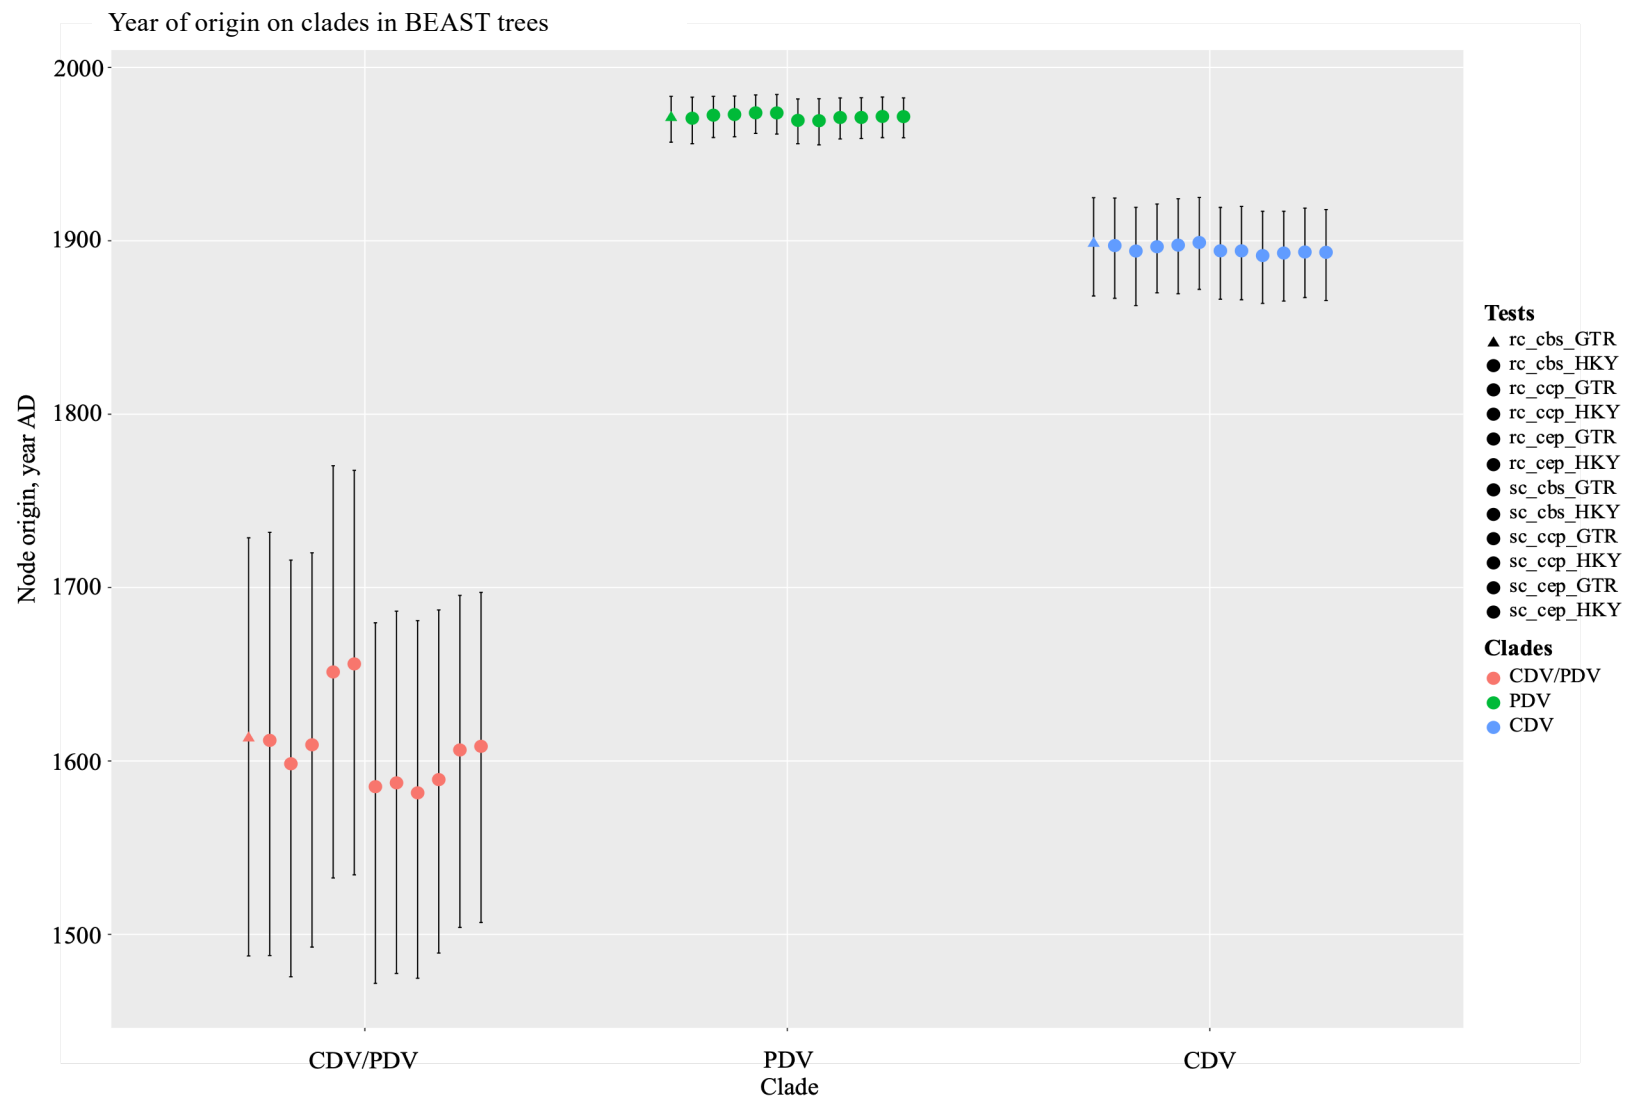

Supplement: Supplementary file 1 [file 31072243]
